# Supplementary material for: Investigating the impact of paternal age, paternal heat stress, and estimation of non-genetic paternal variance on dairy cow phenotype
Source: Springer Nature journal article supplement (doi:10.1186/s12711-024-00918-2), 2024-06-18
Supplement: MOESM1 [file 12711_2024_918_MOESM1_ESM.pdf]

# Additional file 1

**Table S1 Heritability ( $h^2$ ) and effect of paternal heat stress during spermatogenesis on daughters' performance**

| Trait                      | Breed | N       | $h^2$ in %<br>$\pm$ SE | Effect of paternal heat stress before collections (in days) <sup>1</sup> |        |         |       |
|----------------------------|-------|---------|------------------------|--------------------------------------------------------------------------|--------|---------|-------|
|                            |       |         |                        | 0                                                                        | [1-10] | [11-20] | >20   |
| Stature <sup>2</sup>       | Hol   | 53,911  | 49 $\pm$ 2.1           | 0                                                                        | 0.0    | 0.0     | 0.0   |
|                            | Mon   | 77,405  | 67 $\pm$ 1.7           | 0                                                                        | 0.0    | 0.0     | -0.1  |
|                            | Nor   | 21,376  | 60 $\pm$ 3.5           | 0                                                                        | -0.2   | -0.1    | 0.0   |
| Milk yield (kg)            | Hol   | 432,074 | 38 $\pm$ 0.8           | 0                                                                        | 5      | -1      | -4    |
|                            | Mon   | 117,423 | 27 $\pm$ 1.4           | 0                                                                        | 7      | 9       | -4    |
|                            | Nor   | 86,520  | 31 $\pm$ 1.6           | 0                                                                        | 18     | 33      | 5     |
| Fat yield (kg)             | Hol   | 432,074 | 35 $\pm$ 0.8           | 0                                                                        | 0.4    | 0.0     | 0.6   |
|                            | Mon   | 117,423 | 27 $\pm$ 1.4           | 0                                                                        | 0.4    | 0.4     | -0.1  |
|                            | Nor   | 86,520  | 30 $\pm$ 1.6           | 0                                                                        | 0.3    | 1.2     | -1.6  |
| Protein yield (kg)         | Hol   | 432,074 | 31 $\pm$ 0.8           | 0                                                                        | 0.3    | 0.1     | 0.0   |
|                            | Mon   | 117,423 | 24 $\pm$ 1.3           | 0                                                                        | 0.3    | 0.3     | -0.2  |
|                            | Nor   | 86,520  | 27 $\pm$ 1.5           | 0                                                                        | 0.6    | 1.2     | -0.3  |
| Somatic cell score         | Hol   | 432,074 | 17 $\pm$ 0.7           | 0                                                                        | 0.00   | -0.01   | -0.01 |
|                            | Mon   | 117,423 | 17 $\pm$ 1.1           | 0                                                                        | -0.01  | 0.01    | -0.03 |
|                            | Nor   | 86,520  | 19 $\pm$ 1.3           | 0                                                                        | 0.01   | 0.01    | -0.07 |
| Clinical mastitis          | Hol   | 246,761 | 1 $\pm$ 0.2            | 0                                                                        | 0.00   | 0.00    | 0.00  |
|                            | Mon   | 54,096  | 1 $\pm$ 0.2            | 0                                                                        | 0.00   | 0.00    | 0.00  |
|                            | Nor   | 36,323  | 2 $\pm$ 0.5            | 0                                                                        | 0.00   | 0.01    | -0.07 |
| Heifer conception rate (%) | Hol   | 610,953 | 1 $\pm$ 0.1            | 0                                                                        | 0.1    | 0.1     | -0.2  |
|                            | Mon   | 120,983 | 1 $\pm$ 0.2            | 0                                                                        | -0.5   | -0.7    | -0.2  |
|                            | Nor   | 95,840  | 1 $\pm$ 0.2            | 0                                                                        | -0.8   | -0.3    | 0.4   |
| Cow conception rate (%)    | Hol   | 300,260 | 2 $\pm$ 0.2            | 0                                                                        | 0.3    | 0.0     | -1.1  |
|                            | Mon   | 30,511  | 2 $\pm$ 0.6            | 0                                                                        | 0.5    | 2.3     | 2.3   |
|                            | Nor   | 42,189  | 2 $\pm$ 0.4            | 0                                                                        | -0.1   | 0.3     | 6.3   |

Hol=Holstein; Mon=Montbéliarde; Nor=Normande

<sup>1</sup>Days with THI>68 during spermatogenesis (60d to 0d prior to collection)

<sup>2</sup>Observation unit depends on cow breed: score from 1 to 9 in Holstein, cm in Montbéliarde and Normande breeds.

No significant difference between means (FDR<0.05)
